# Supplementary material for: Contamination, Source Identification, Ecological and Human Health Risks Assessment of Potentially Toxic-Elements in Soils of Typical Rare-Earth Mining Areas
Source: Int J Environ Res Public Health. 2022 Nov 16;19(22):15105. doi: 10.3390/ijerph192215105 (PMC9690513; doi:10.3390/ijerph192215105)
Supplement: Supplementary file 1 [file ijerph-19-15105-s001.zip › ijerph-1995390-supplementary.pdf]

## **Supplementary Material**

### **Tables**

Table.S1 Classification of enrichment factor and nemerow integrated pollution index

Table.S2 Potential ecological risk classification of potentially toxic elements before and after revision.

Table S3 Parameters, input assumptions and calculation formulas for human non-carcinogenic risk assessment

Table S4 Values of RfD (mg/kg/day) for seven potentially toxic elements in the three exposure pathways

Table S5 Average non-carcinogenic exposure of potentially toxic elements in soil under three exposure pathways [mg/(kg·d)]

Table.S6 Evaluation standards of non-carcinogenic risk

### **Figures**

Figure S1 Enrichment index of potentially toxic elements in soil of the study area.

Figure S2 Correlation analysis between potentially toxic elements and physicochemical properties in soil. \* represented the significant to probability level 0.05, \*\* represented the significant to probability level 0.01, and \*\*\* represented the significant to probability level 0.001.

Figure S3 Distribution of physicochemical properties in soils in the study area (pH, TC, TN).

Figure S4 Contribution rate of each factor to potentially toxic element concentration sources

Figure S5 The thematic map of the study area. (a) The surface coverage of the study area and the location of the mine sites. (b) The network of roads and waterway and distribution of factory sites around the study area. (c) The subdivision of towns around the study area. (d) Population density in the study area and the distribution of sampling sites.

**Table S1.** Classification of enrichment factor and nemerow integrated pollution index

| Range        | Classification                  | Range         | Classification         |
|--------------|---------------------------------|---------------|------------------------|
| EF < 2       | Depletion to minimum enrichment | NPI < 0.7     | Clean                  |
| 2 ≤ EF < 5   | moderate enrichment             | 0.7 ≤ NPI < 1 | Relatively clean       |
| 5 ≤ EF < 20  | significant enrichment          | 1 ≤ NPI < 2   | Lightly contaminated   |
| 20 ≤ EF < 40 | very high enrichment            | 2 ≤ NPI < 3   | Contaminated           |
| EF > 40      | extremely high enrichment       | NPI ≥ 3       | Extremely contaminated |

$$EF = \frac{(C_i/C_{ref})_{sample}}{(C_i/C_{ref})_{background}}$$

where  $C_i$  is the concentration of the potentially toxic elements (mg/kg);  $C_{ref}$  is the concentration of the standardized reference element (mg/kg), and the elements Sc, Mn, Ti, Al and Fe are usually chosen as references. In this study, Sc was used as the reference element because of the relatively high stability of element Sc concentration.

**Table S2.** Potential ecological risk classification of potentially toxic elements before and after revision.

| Classification | $E_{ri}$                |                        | RI                  |                     |
|----------------|-------------------------|------------------------|---------------------|---------------------|
|                | Hakanson                | This study             | Hakanson            | This study          |
| Slight         | $E_{ri} < 40$           | $E_{ri} < 20$          | $RI < 150$          | $RI < 50$           |
| Medium         | $40 \leq E_{ri} < 80$   | $20 \leq E_{ri} < 40$  | $150 \leq RI < 300$ | $50 \leq RI < 100$  |
| Strong         | $80 \leq E_{ri} < 160$  | $40 \leq E_{ri} < 80$  | $300 \leq RI < 600$ | $100 \leq RI < 200$ |
| Very strong    | $160 \leq E_{ri} < 320$ | $80 \leq E_{ri} < 160$ | $RI > 600$          | $RI \geq 400$       |

**Table S3.** Parameters, input assumptions and calculation formulas for human non-carcinogenic risk

assessment

| Symbol      | Parameter                                                                                    | Unit                | Value                                                                         |
|-------------|----------------------------------------------------------------------------------------------|---------------------|-------------------------------------------------------------------------------|
| $C_i$       | Concentration of an element                                                                  | mg/kg               |                                                                               |
| $IR_{ing}$  | Soil ingestion rate                                                                          | mg/day              | 200 (for child), 100 (for adult)                                              |
| EF          | Exposure frequency                                                                           | day/year            | 350                                                                           |
| $IR_{inh}$  | Air inhalation rate                                                                          | m <sup>3</sup> /day | 7.5 (for child), 14.5 (for adult)                                             |
| ED          | Exposure duration                                                                            | year                | 24 [6 (for child) for non-cancer effects]                                     |
| SA          | Skin area                                                                                    | cm <sup>2</sup>     | 2848.01(for child), 5373.99 (for adult)                                       |
| SL          | Skin adherence factor                                                                        | mg/cm <sup>2</sup>  | 0.2 (for child), 0.07(for adult)                                              |
| BW          | Body weight                                                                                  | kg                  | 19.2(for child), 61.8(for adult)                                              |
| AT          | Mean Time                                                                                    | day                 | 9125 for non-carcinogens                                                      |
| ABS         | Dermal absorption factor                                                                     | Unitless            | 0.006(Pb), 0.14(Cd), 0.1(Cu), 0.02(Zn),<br>0.05(Hg), 0.03(As), 0.001 for rest |
| PEF         | Particle emission factor                                                                     | m <sup>3</sup> /kg  | 1.36E9                                                                        |
| $ADD_{ing}$ | $\frac{C_i \times IR_{ing} \times EF \times ED}{BW \times AT} \times 10^{-6}$                |                     |                                                                               |
| $ADD_{der}$ | $\frac{C_i \times SA \times SL \times ABS \times EF \times ED}{BW \times AT} \times 10^{-6}$ |                     |                                                                               |
| $ADD_{inh}$ | $\frac{C_i \times IR_{inh} \times EF \times ED}{PEF \times BW \times AT}$                    |                     |                                                                               |
| $HQ_{ADD}$  | $\frac{ADD}{Rfd}$                                                                            |                     |                                                                               |

**Table S4.** Values of RfD (mg/kg/day) for seven potentially toxic elements in the three exposure pathways

|                           | Co        | Cr       | Cu     | Ni    | Pb      | Zn   | V       |
|---------------------------|-----------|----------|--------|-------|---------|------|---------|
| RfD for ingestion         | 0.02      | 0.005    | 0.037  | 0.02  | 0.0035  | 0.3  | 0.007   |
| RfD for dermal absorption | 0.016     | 0.00025  | 0.0019 | 0.001 | 0.00053 | 0.06 | 0.00007 |
| RfD for inhalation        | 0.0000057 | 0.000029 | 0.04   | 0.021 | 0.0035  | 0.3  | 0.007   |

**Table S5.** Average non-carcinogenic exposure of potentially toxic elements in soil under three exposure pathways [mg/(kg·d)]

| Elements | Adult              |                    |                    | Child              |                    |                    |
|----------|--------------------|--------------------|--------------------|--------------------|--------------------|--------------------|
|          | ADD <sub>ing</sub> | ADD <sub>der</sub> | ADD <sub>inh</sub> | ADD <sub>ing</sub> | ADD <sub>der</sub> | ADD <sub>inh</sub> |
| Co       | 2.56E-05           | 9.64E-08           | 2.73E-09           | 1.65E-04           | 4.70E-07           | 4.55E-09           |
| Cr       | 4.60E-05           | 5.46E-08           | 4.91E-09           | 2.96E-04           | 8.44E-07           | 8.17 E-09          |
| Cu       | 2.86E-05           | 3.39E-06           | 3.04E-09           | 1.84E-04           | 5.24E-07           | 5.07E-09           |
| Ni       | 3.26E-05           | 3.86E-08           | 6.65E-08           | 2.10E-04           | 5.97E-07           | 5.78E-09           |
| Pb       | 6.76E-05           | 4.81E-07           | 7.21E-09           | 4.35E-04           | 1.24E-06           | 1.20E-08           |
| Zn       | 1.68E-04           | 3.98E-06           | 1.79E-08           | 1.08E-03           | 3.07E-06           | 2.979E-08          |
| V        | 8.10E-05           | 1.92E-06           | 1.79E-08           | 5.22E-04           | 1.49E-06           | 1.44E-08           |

**Table S6.** Evaluation standards of Non-carcinogenic risk

| HI               | Evaluation                                      |
|------------------|-------------------------------------------------|
| $HI \leq 1$      | No significant risk of non-carcinogenic effects |
| $1 < HI \leq 10$ | Probability of the adverse health effects       |
| $HI > 10$        | High chronic risk                               |

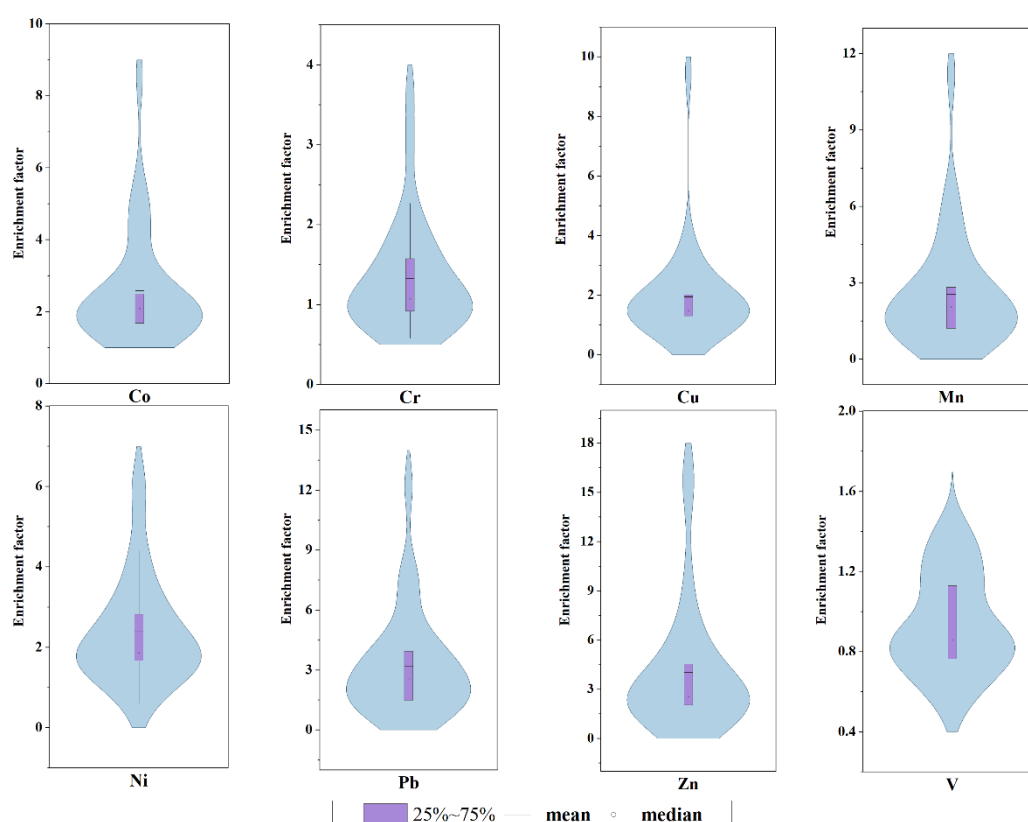

**Figure S1.** Enrichment factor of potentially toxic elements in soil of the study area. The solid line represents the average value of the study area

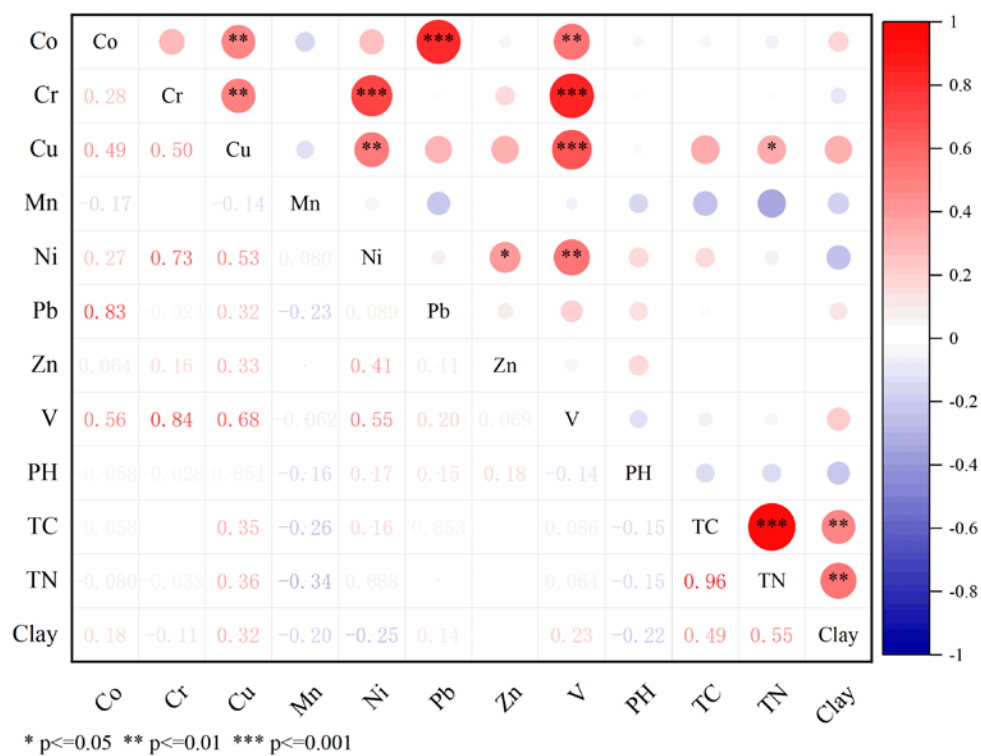

**Figure S2.** Correlation analysis between potentially toxic elements and physicochemical properties in soil. \* represented the significant to probability level 0.05, \*\* represented the significant to probability level 0.01, and \*\*\* represented the significant to probability level 0.001.

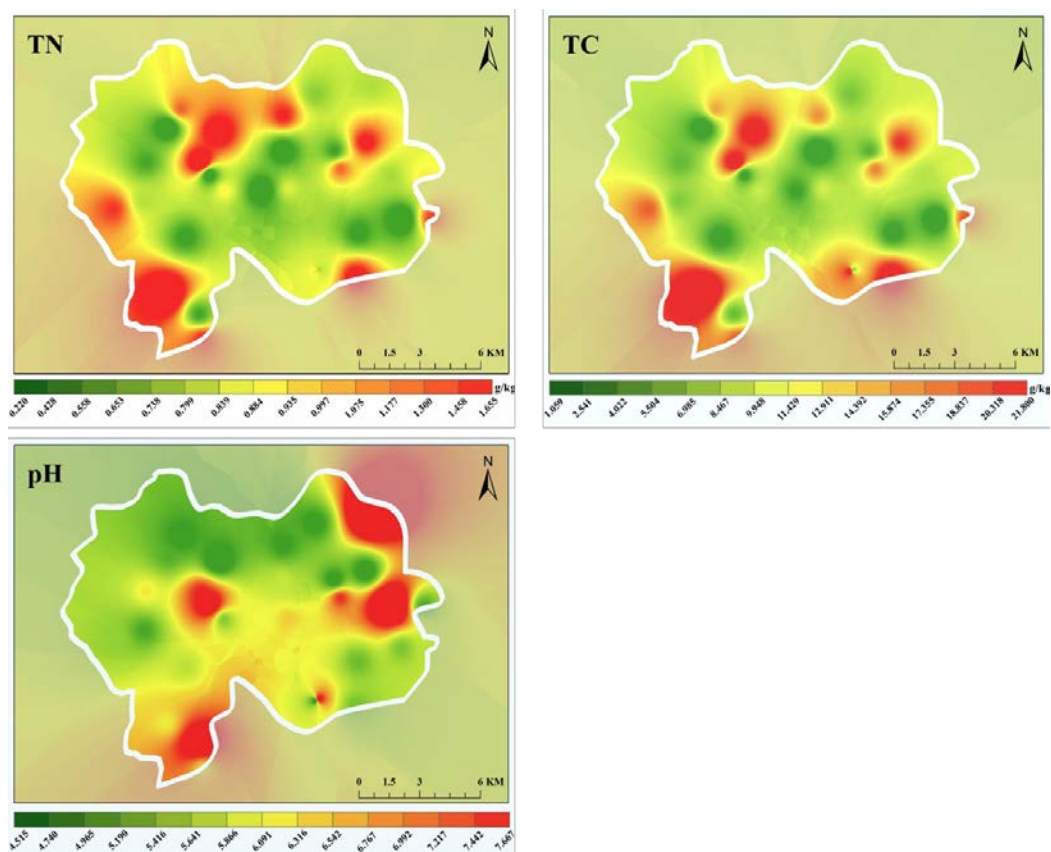

**Figure S3.** Distribution of physicochemical properties in soils in the study area (pH, TC, TN).

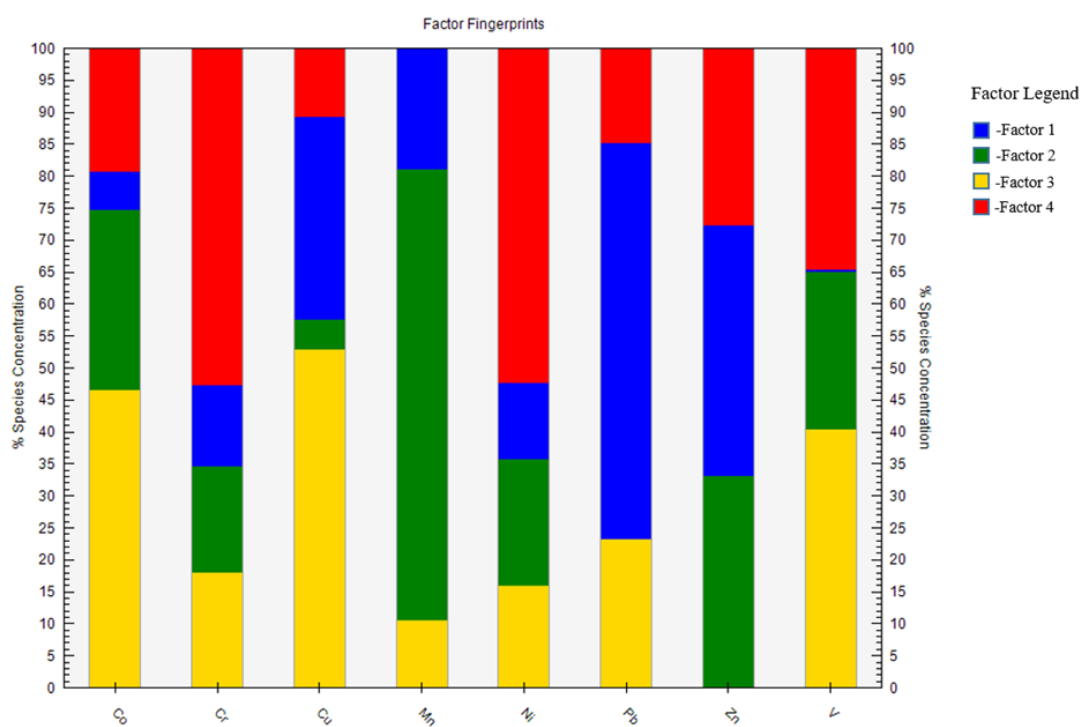

**Figure S4.** Contribution rate of each factor to potentially toxic elements sources

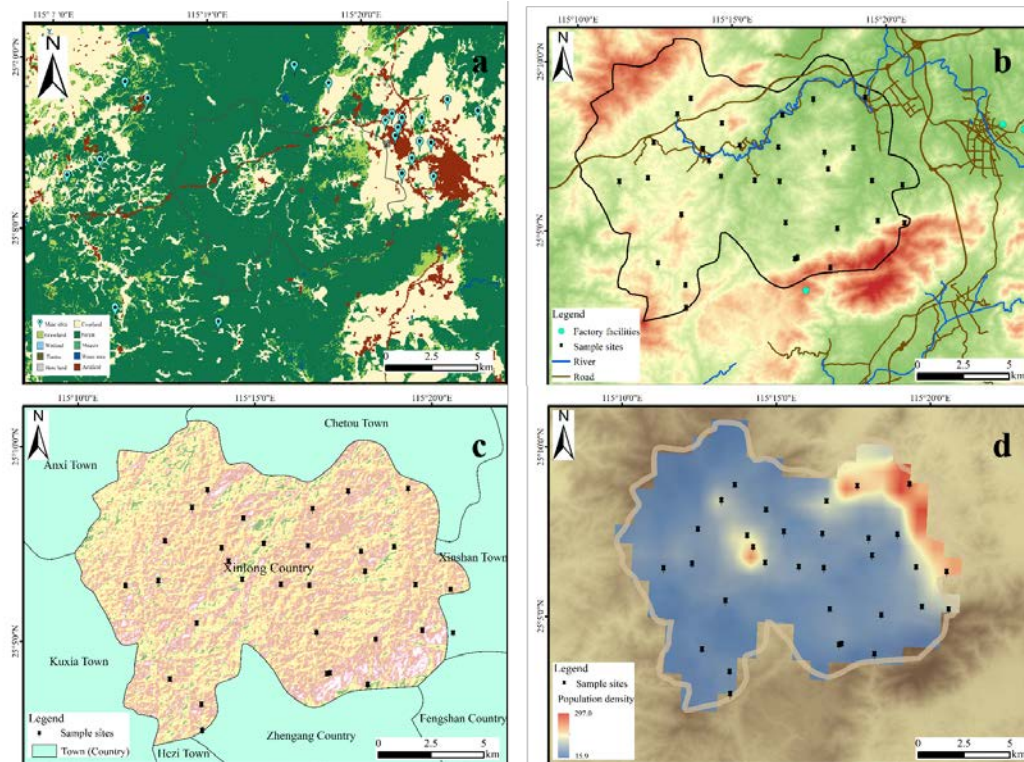

**Figure S5.** The thematic map of the study area. **(a)** The surface coverage of the study area and the location of the mine sites. **(b)** The network of roads and waterway and distribution of factory sites around the study area. **(c)** The subdivision of towns around the study area. **(d)** Population density in the study area and the distribution of sampling sites.
